# Supplementary material
Source: publisher figshare collection journal article supplement (https://gsajournals.figshare.com/articles/dataset/_/27642732)
Supplement: Supplementary file 1 [file 1]

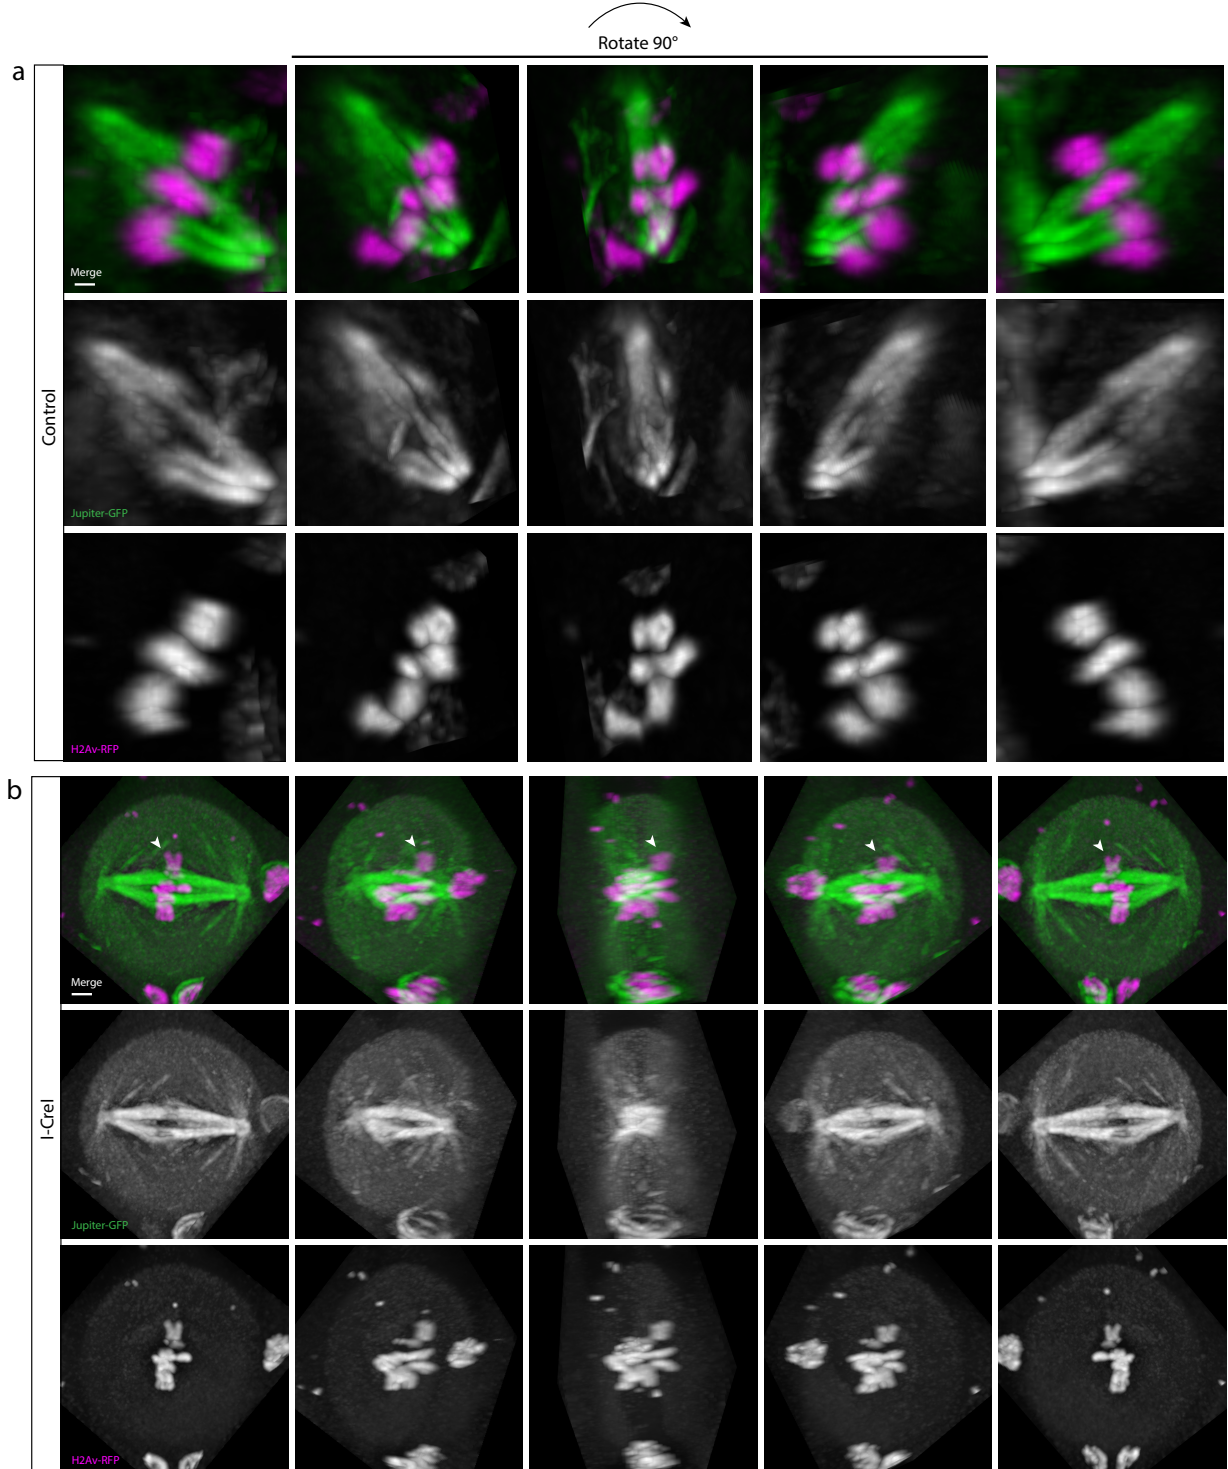

**Figure S6: I-Cre1 induction produces a toroidal arrangement of congressed chromosomes with microtubules absent in the center.** (a) Still images of a 3D rendering of a neuroblast at metaphase labeled with H2Av-RFP (magenta) and Jupiter-GFP labeled microtubules (green) not expressing I-Cre1 (N=5 cells). (b) Still frames of a 3D rendering of a neuroblast at metaphase with I-Cre1 induced acentrics (white arrowheads) (N=5 cells). Bars, 2  $\mu$ m. Images are rotated 90°. At least 1 brain per replicate was examined. At least 3 replicates were performed for each experiment.
