# Supplementary material
Source: publisher figshare collection journal article supplement (https://gsajournals.figshare.com/articles/dataset/_/27642732)
Supplement: Supplementary file 2 [file 1]

| RNAi line/mutant | Polar ejection forces (PEFs) | Interpolar microtubules | Metaphase alignment of acentrics | References                                                                            |
|------------------|------------------------------|-------------------------|----------------------------------|---------------------------------------------------------------------------------------|
| <i>eb1</i>       | Compromised                  | Compromised             | Compromised                      | Rogers <i>et al.</i> , 2002, Popova <i>et al.</i> , 2022, Vicars <i>et al.</i> , 2021 |
| <i>klp3a</i>     | Compromised                  | Compromised             | Compromised                      | Kwon <i>et al.</i> , 2004, Karg <i>et al.</i> , 2017                                  |
| <i>klp31e</i>    | Normal                       | Compromised             | Normal                           | Goshima & Vale, 2003                                                                  |
| <i>cmet</i>      | Normal                       | Normal                  | Normal                           | Yucel <i>et al.</i> , 2000                                                            |

**Table S1: Summary of phenotypes of various gene knockdowns.** Observed or previously reported cellular phenotypes caused by knockdown of listed microtubule- or kinetochore-associated proteins. Phenotypes are organized by disruptions of polar ejection forces (PEFs), disruptions of interpolar microtubule structure, and misalignment of acentric sister chromatids at metaphase.
