# Supplementary material
Source: publisher figshare collection journal article supplement (https://gsajournals.figshare.com/articles/dataset/_/27642732)
Supplement: Supplementary file 3 [file 1]

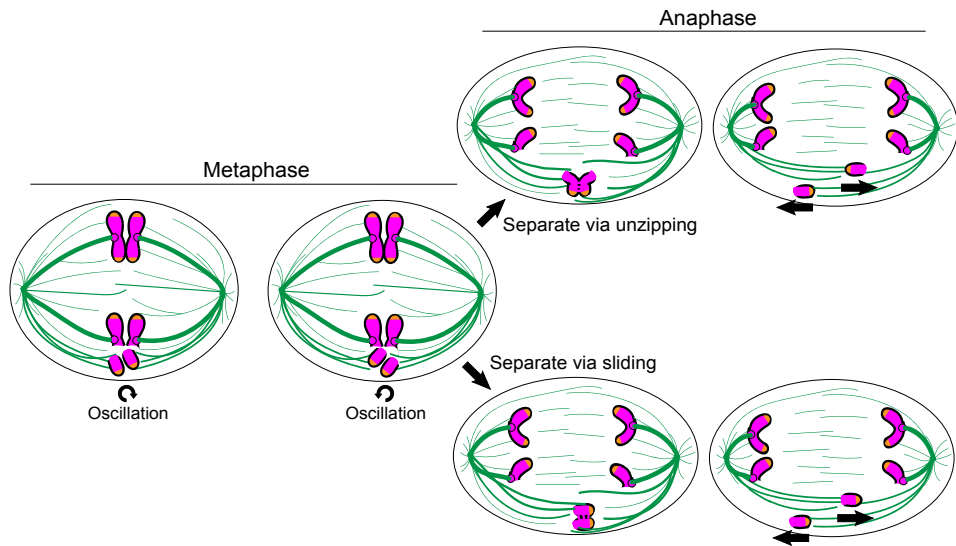

**Figure S4: Schematic depicting acentric chromosome alignment at metaphase and separation in anaphase.** Chromosomes in magenta, microtubules in green, and telomeres in orange. Acentric sister chromatids align at the metaphase plate while undergoing oscillations. Depending on the final orientation of the acentrics upon anaphase onset, the acentrics may separate by “unzipping” from one another (perpendicular to the spindle) or by sliding past one another (parallel to the spindle). For further discussion of this model, see Vicars *et al.*, 2021.
