# Supplementary material
Source: publisher figshare collection journal article supplement (https://gsajournals.figshare.com/articles/dataset/_/27642732)
Supplement: Supplementary file 4 [file 1]

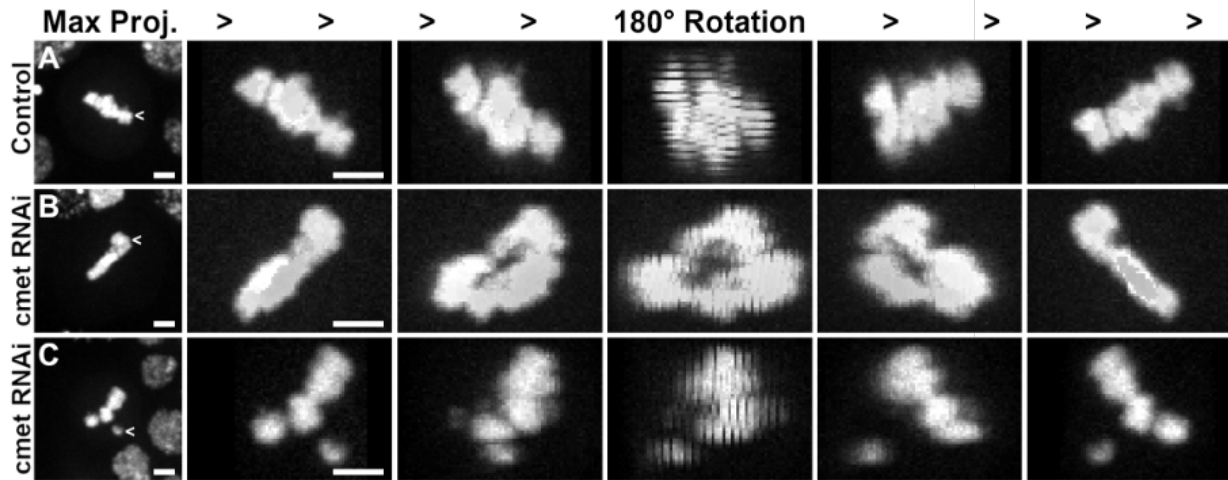

**Figure S3: Acentric congression is unaltered in cells expressing *cmet* (Cenp-E) RNAi.** Still images of neuroblasts at metaphase labeled with H2Av-RFP with I-Crel induced. The elav-Gal4 driver was used to knockdown *cmet* expression in larval brains using the *cmet* RNAi line (BDSC ID: 35816). (a) In control cells, acentrics congress at the edge of the metaphase plate. No cells in the control (N=0/18 cells) had defects in acentric chromosome congression. (b) In cells expressing *cmet* RNAi, 31/33 cells exhibited normal intact and acentric chromosome congression, similar to wild type cells. (c) In cells expressing *cmet* RNAi, 2/33 cells exhibited misaligned acentric chromosomes. There was no significant difference in acentric congression failure rates compared to the control. P-value = 0.29,  $\chi^2$  test. Left: max projections of chromosomes taken with 0.3  $\mu$ m Z-steps. Positions of acentrics are indicated with white arrows. Right: frames of a 3D rendering rotated 180°. Bars = 2  $\mu$ m. Experiments include 5 replicates with 13 total individual brains imaged.
