# Supplementary material
Source: publisher figshare collection journal article supplement (https://gsajournals.figshare.com/articles/dataset/_/27642732)
Supplement: Supplementary file 5 [file 1]

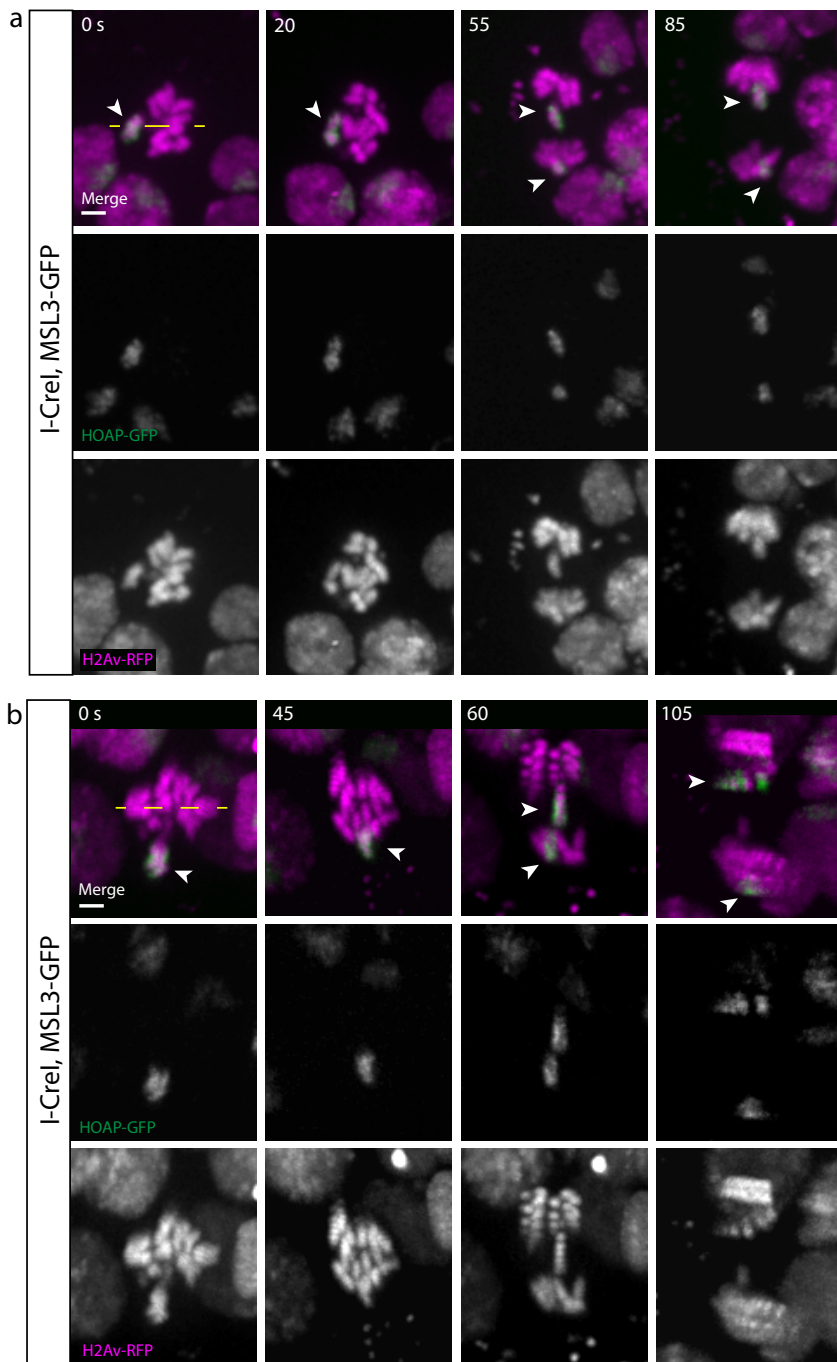

**Figure S5: Misaligned acentrics separate and segregate normally in anaphase.** (a) Still frames of a time-lapse video of a mitotic neuroblast with I-Cre1 induced acentrics expressing MSL3-GFP. Paired sister acentrics (white arrowheads) properly align at the metaphase plate, lag behind at the spindle equator in anaphase, and eventually separate and segregate (N=24 cells). (b) Still frames of a time-lapse video of a mitotic neuroblast with I-Cre1 induced acentrics expressing MSL3-GFP. Paired sister acentrics (white arrowheads) fail to align at the metaphase plate, lag behind at the spindle equator in anaphase, but eventually separate, segregate, and incorporate into daughter nuclei (N=1 cell). Due to the infrequent occurrence of misaligned acentrics in control cells, we could only have one video with the timing and resolution to examine this relationship. Bars, 2  $\mu$ m. Time in seconds.
