# Supplementary material
Source: publisher figshare collection journal article supplement (https://gsajournals.figshare.com/articles/dataset/_/27642732)
Supplement: Supplementary file 6 [file 1]

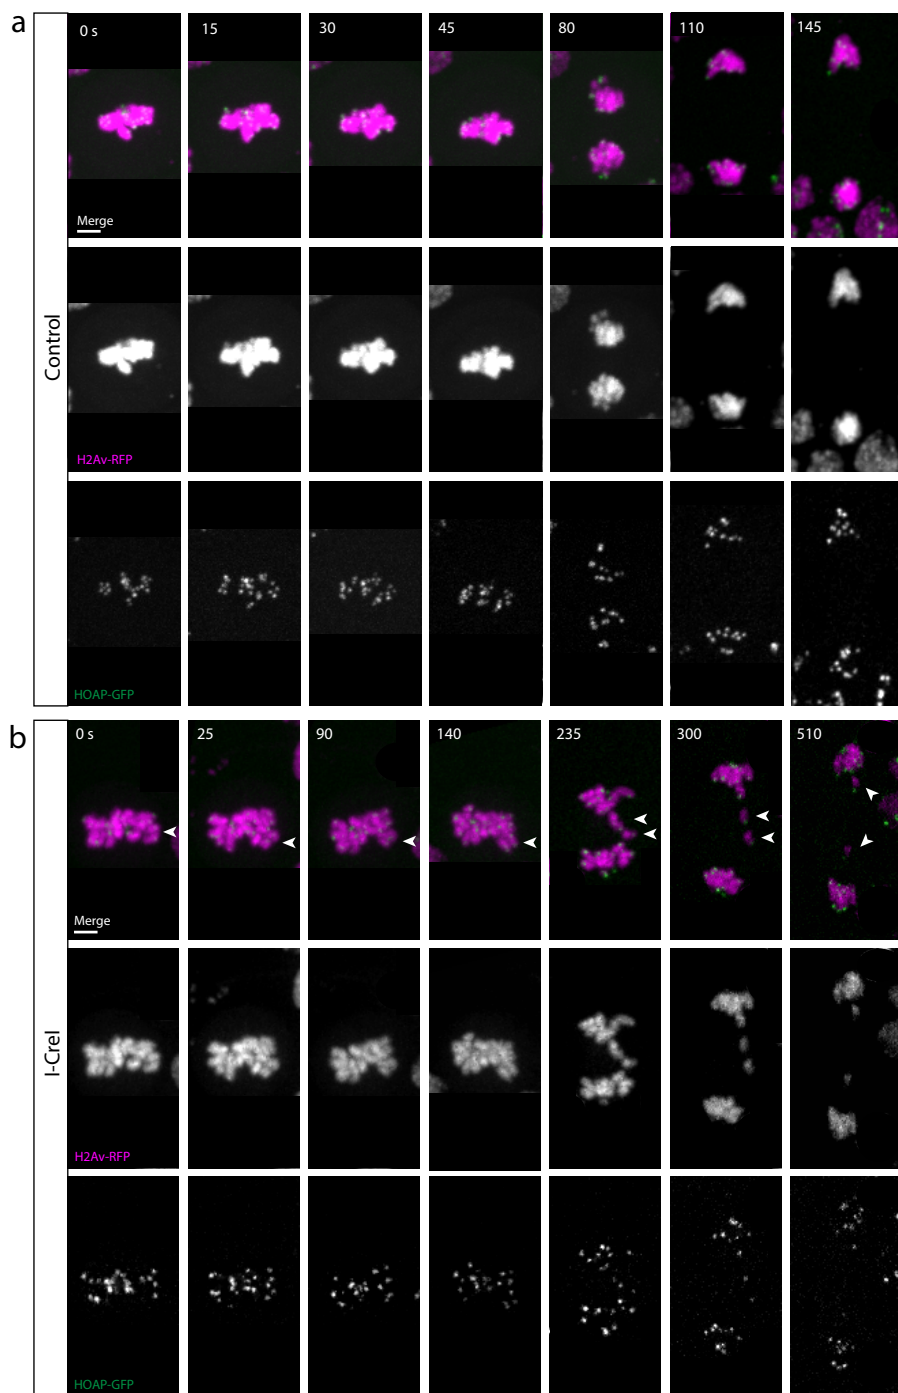

**Figure S2: Acentrics align at the metaphase plate with telomeres paired.** (a) Still frames of a time-lapse video of a mitotic neuroblast labeled with H2AvRFP (magenta) and HOAP-GFP (green) not expressing I-CreI. All intact chromosomes have telomeres paired and aligned (N=25/25 chromosome pairs) (b) Still frames of a time-lapse video of a mitotic neuroblast with I-CreI induced acentrics (white arrowheads). Most acentrics are oriented with their telomeres paired during metaphase. Bars, 2  $\mu$ m. Time in seconds. At least 1 brain per replicate was examined. At least 3 replicates were performed for each experiment.
