# Supplementary material
Source: publisher figshare collection journal article supplement (https://gsajournals.figshare.com/articles/dataset/_/27642732)
Supplement: Supplementary file 7 [file 1]

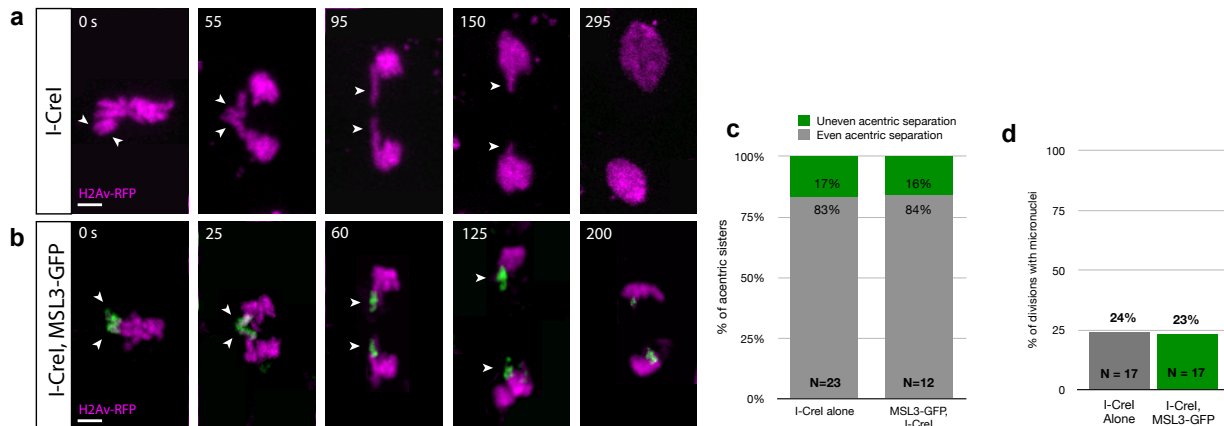

**Figure S1: Neuroblasts expressing MSL3-GFP and I-Crel behave similarly to neuroblasts only expressing I-Crel.** (a) Still frames of a time-lapse video of a mitotic neuroblast with I-Crel induced acentrics. Paired sister acentrics (white arrowheads) align at the metaphase plate, lag behind at the spindle equator in anaphase, and eventually separate, segregate, and incorporate into daughter nuclei. (b) Still frames of a time-lapse video of a mitotic neuroblast with I-Crel induced acentrics and expressing MSL3-GFP. Bars, 2  $\mu$ m. Time in seconds. (c) Percentages of acentric sisters that fail to completely separate from one another. At least 1 brain per replicate was examined. At least 3 replicates were performed for each experiment. (d) Percentages of neuroblast divisions in which acentrics failed to incorporate into daughter nuclei and formed one or more micronuclei. At least 1 brain per replicate was examined. At least 3 replicates were performed for each experiment.
